# Supplementary material for: Direct analysis of naphthenic acids in produced water and crude oil by NH2-surface-modified wooden-tip electrospray ionization mass spectrometry
Source: Royal Society of Chemistry journal article supplement (doi:10.1039/d1ay01541a), 2021-01-01
Supplement: d1ay01541a1.pdf [file d1ay01541a1.pdf]

## Supplementary information

### Direct analysis of naphthenic acids in produced water and crude oil by NH<sub>2</sub>-surface-modified wooden-tip electrospray ionization mass spectrometry

Thais A. M. da Silva,<sup>a</sup> Igor Pereira,<sup>a</sup> Deborah V. A. de Aguiar,<sup>a</sup> Gabriel F. dos Santos,<sup>a\*</sup> Talita P. de Brito,<sup>a</sup>  
Rogério M. de Carvalho,<sup>b</sup> Iris Medeiros Junior,<sup>b</sup> Rosineide C. Simas,<sup>a</sup> and Boniek G. Vaz<sup>a\*</sup>

<sup>a</sup> Laboratory of Chromatography and Mass Spectrometry, Institute of Chemistry, Federal University of  
Goiás, Goiânia, 59078-970, GO, Brazil.

<sup>b</sup> CENPES, PETROBRAS, Rio de Janeiro, RJ, 21941-915, Brazil

\*Corresponding author.

E-mail address: boniek@ufg.br (B. G. Vaz)

E-mail address: gfs.dossantos@gmail.com (G. F. dos Santos)

#### Table of contents:

|                                                                                                                                                                                                                                     |           |
|-------------------------------------------------------------------------------------------------------------------------------------------------------------------------------------------------------------------------------------|-----------|
| <b>Fig. S1.</b> WT-ESI system: a metal clip holds the modified wooden toothpick and applies a high voltage to it, causing droplets from the sample to be electrosprayed from the tip of the toothpick into a mass spectrometer..... | <b>S2</b> |
| <b>Fig. S2.</b> FT-IR spectra of A) unmodified and B) modified wooden toothpick.....                                                                                                                                                | <b>S3</b> |
| <b>Fig. S3.</b> SEM-EDS analyses of unmodified and modified wooden toothpicks: SEM images of A) unmodified and B) modified substrates; EDS spectra of C) unmodified and D) modified substrates.....                                 | <b>S3</b> |
| <b>Fig. S4.</b> NH <sub>2</sub> -SMWT-ESI analysis of decanoic acid in seawater at concentrations ranging from 5 to 500 µg mL <sup>-1</sup> . Error bars show the standard deviation of triplicate measurements.....                | <b>S4</b> |
| <b>Fig. S5.</b> Negative ion mode mass spectra obtained from the NH <sub>2</sub> -SMWT-ESI analysis of produced water samples.....                                                                                                  | <b>S4</b> |

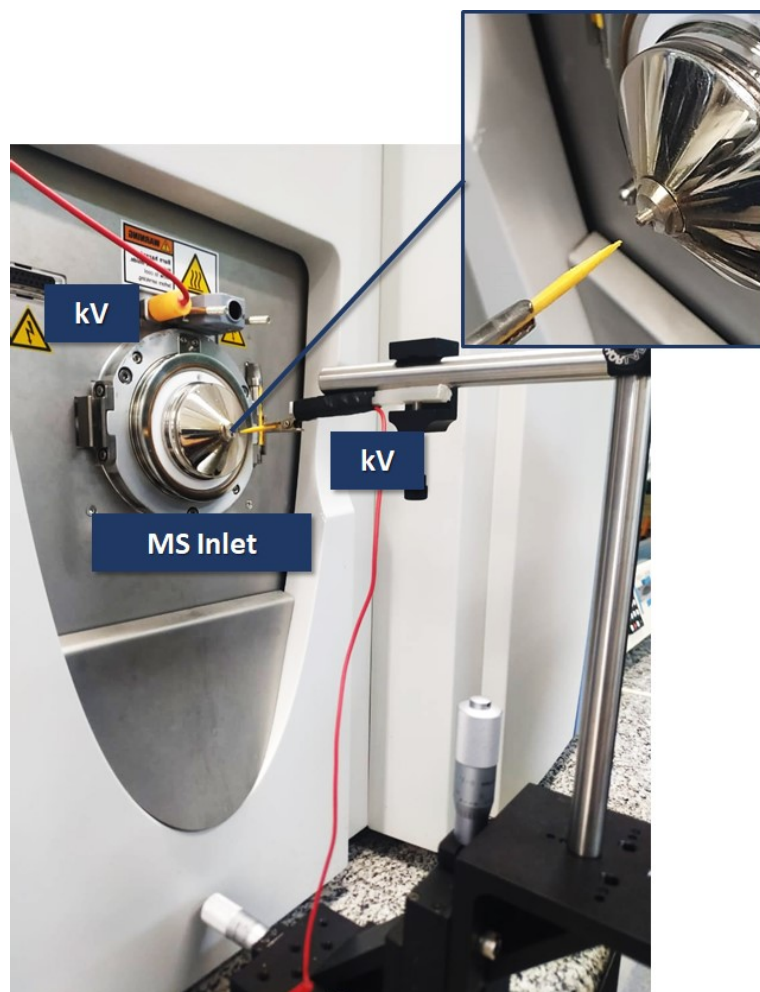

**Fig. S1.** WT-ESI system: a metal clip holds the modified wooden toothpick and applies a high voltage to it, causing droplets from the sample to be electro sprayed from the tip of the toothpick into a mass spectrometer.

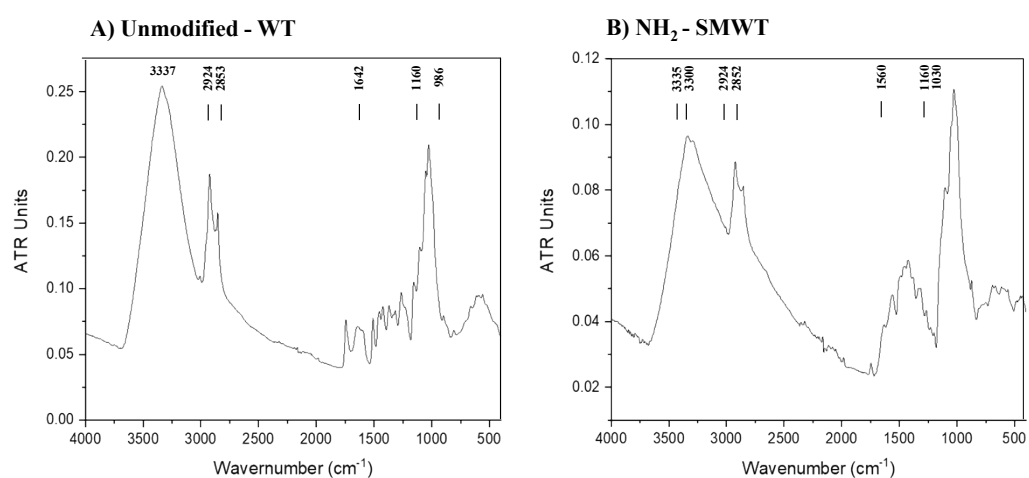

**Fig. S2.** FT-IR spectra of A) unmodified and B) modified wooden toothpick.

A) Unmodified WT

B) NH<sub>2</sub>-WT

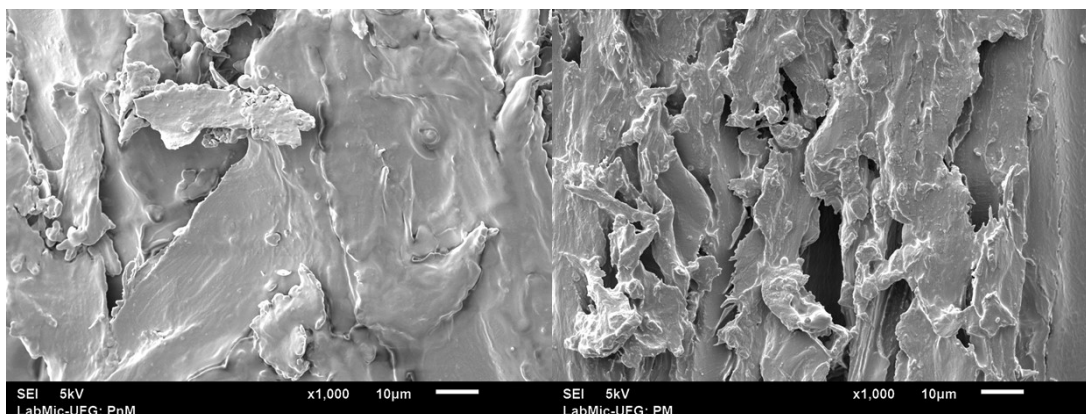

B) Unmodified WT

D) NH<sub>2</sub>-WT

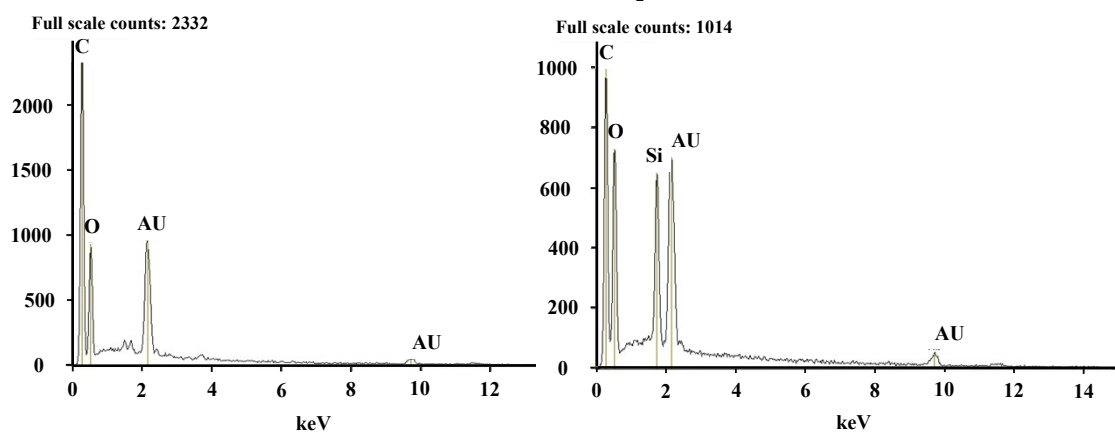

**Fig. S3.** SEM-EDS analyses of uncoated and coated wooden toothpicks: SEM images of A) unmodified and B) modified substrates; EDS spectra of C) unmodified and D) modified substrates.

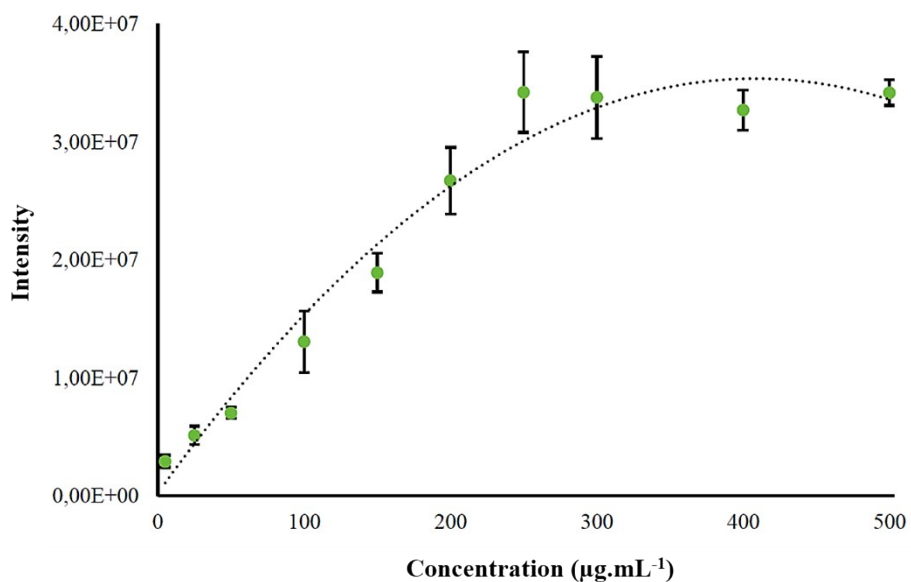

**Fig. S4.** NH<sub>2</sub>-SMWT-ESI analysis of decanoic acid in seawater at concentrations ranging from 5 to 500 µg.mL<sup>-1</sup>. Error bars show the standard deviation of triplicate measurements.

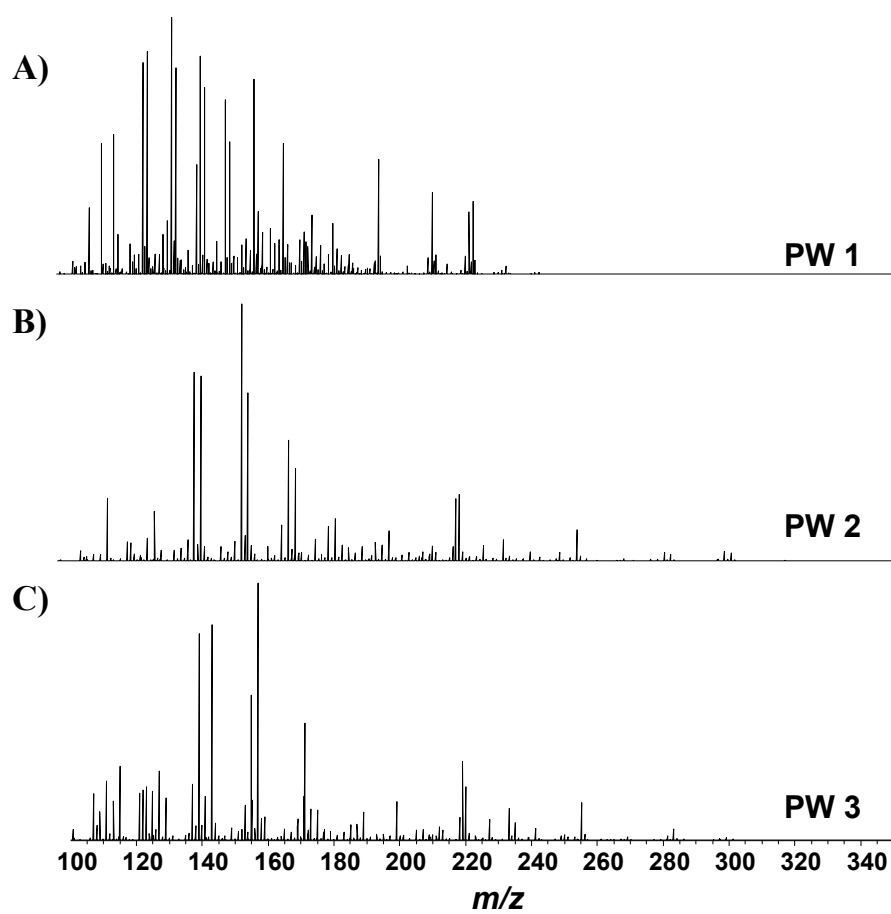

**Fig. S5.** Negative ion mode mass spectra obtained from the  $\text{NH}_2$ -SMWT-ESI analysis of produced water (PW) samples.
